# Supplementary material for: Dose–Response Association between Adiposity and Liver Cancer Incidence: A Prospective Cohort Study among Non-Smoking and Non–Alcohol-Drinking Chinese Women
Source: Oxford University Press journal article supplement (doi:10.1158/1055-9965.epi-20-1610), 2021-04-13
Supplement: 10559965epi201610-sup-255271_3_supp_6986241_qq00bg.docx [file 10559965epi201610-sup-255271_3_supp_6986241_qq00bg.docx]

| Supplementary Table ST1 Correlation matrix of anthropometric measurements among non-smoking and non-alcohol drinking women (1996–2016)a | | | | | | | | | | | | | | |
| --- | --- | --- | --- | --- | --- | --- | --- | --- | --- | --- | --- | --- | --- | --- |
| Anthropometrics | Height | Weight | BMI | Height at age 20 | Weight at age 20 | BMI at age 20 | WC | HC | WHR | WHtR | WCadjb | HCadjb | WHRadjb | WHtRadjb |
| Height | 1.000 |  |  |  |  |  |  |  |  |  |  |  |  |  |
| Weight | 0.328 | 1.000 |  |  |  |  |  |  |  |  |  |  |  |  |
| BMI | -0.137 | 0.870 | 1.000 |  |  |  |  |  |  |  |  |  |  |  |
| Height at age 20 | 0.928 | 0.363 | -0.060 | 1.000 |  |  |  |  |  |  |  |  |  |  |
| Weight at age 20 | 0.312 | 0.328 | 0.189 | 0.342 | 1.000 |  |  |  |  |  |  |  |  |  |
| BMI at age 20 | -0.104 | 0.177 | 0.240 | -0.108 | 0.878 | 1.000 |  |  |  |  |  |  |  |  |
| WC | -0.026 | 0.772 | 0.831 | 0.071 | 0.168 | 0.151 | 1.000 |  |  |  |  |  |  |  |
| HC | 0.094 | 0.792 | 0.786 | 0.165 | 0.218 | 0.157 | 0.806 | 1.000 |  |  |  |  |  |  |
| WHR | -0.148 | 0.377 | 0.477 | -0.069 | 0.030 | 0.071 | 0.721 | 0.214 | 1.000 |  |  |  |  |  |
| WHtR | -0.309 | 0.625 | 0.829 | -0.196 | 0.067 | 0.176 | 0.951 | 0.730 | 0.730 | 1.000 |  |  |  |  |
| WCadjb | 0.171 | 0.097 | 0.020 | 0.229 | 0.018 | -0.093 | 0.531 | 0.269 | 0.587 | 0.451 | 1.000 |  |  |  |
| HCadjb | 0.340 | 0.164 | <0.001 | 0.351 | 0.110 | -0.055 | 0.232 | 0.576 | -0.272 | 0.118 | 0.433 | 1.000 |  |  |
| WHRadjb | -0.092 | -0.024 | 0.026 | -0.044 | -0.067 | -0.049 | 0.372 | -0.171 | 0.868 | 0.383 | 0.665 | -0.318 | 1.000 |  |
| WHtRadjb | -0.361 | -0.161 | 0.015 | -0.271 | -0.174 | -0.054 | 0.444 | 0.137 | 0.595 | 0.531 | 0.825 | 0.216 | 0.676 | 1.000 |
| a Spearman's rank correlation coefficient. | | | | | | | | | | | | | | |
| b Adjusted for BMI using residual method. | | | | | | | | | | | | | | |

| Supplementary Table ST2 multivariable-adjusted HRs for anthropometric measurements and liver cancer risk among non-smoking and non-alcohol drinking women (1996–2016) | | | | | | |
| --- | --- | --- | --- | --- | --- | --- |
| Extra effect of fat distribution | Conventional methoda | Residual methodb |  | Mutual adjustmentc | HR for BMI | HR for fat distribution measurements |
| WC / WCadj |  |  |  | WCadj & BMI |  |  |
| Q1 | 1.00 (Reference) | 1.00 (Reference) |  | Q1 | 1.00 (Reference) | 1.00 (Reference) |
| Q2 | 1.00 (0.63, 1.57) | 1.03 (0.67, 1.56) |  | Q2 | 1.08 (0.72, 1.63) | 1.06 (0.69, 1.61) |
| Q3 | 0.90 (0.56, 1.44) | 1.21 (0.82, 1.81) |  | Q3 | 1.12 (0.75, 1.67) | 1.26 (0.85, 1.87) |
| Q4 | 1.29 (0.75, 2.20) | 1.38 (0.94, 2.02) |  | Q4 | 1.53 (1.05, 2.23) | 1.42 (0.97, 2.08) |
| HC / HCadj |  |  |  | HCadj & BMI |  |  |
| Q1 | 1.00 (Reference) | 1.00 (Reference) |  | Q1 | 1.00 (Reference) | 1.00 (Reference) |
| Q2 | 0.97 (0.61, 1.55) | 0.90 (0.59, 1.36) |  | Q2 | 1.09 (0.72, 1.64) | 0.92 (0.61, 1.39) |
| Q3 | 1.04 (0.64, 1.69) | 1.49 (1.04, 2.15) |  | Q3 | 1.13 (0.76, 1.69) | 1.52 (1.06, 2.19) |
| Q4 | 1.43 (0.84, 2.43) | 1.32 (0.92, 1.90) |  | Q4 | 1.52 (1.04, 2.22) | 1.33 (0.93, 1.92) |
| WHR / WHRadj |  |  |  | WHRadj & BMI |  |  |
| Q1 | 1.00 (Reference) | 1.00 (Reference) |  | Q1 | 1.00 (Reference) | 1.00 (Reference) |
| Q2 | 1.16 (0.77, 1.75) | 1.39 (0.95, 2.02) |  | Q2 | 1.09 (0.72, 1.64) | 1.42 (0.98, 2.08) |
| Q3 | 0.93 (0.61, 1.42) | 0.98 (0.66, 1.45) |  | Q3 | 1.13 (0.75, 1.68) | 1.00 (0.68, 1.49) |
| Q4 | 1.13 (0.75, 1.70) | 1.12 (0.77, 1.63) |  | Q4 | 1.53 (1.05, 2.23) | 1.16 (0.80, 1.68) |
| WHtR / WHtRadj |  |  |  | WHtRadj & BMI |  |  |
| Q1 | 1.00 (Reference) | 1.00 (Reference) |  | Q1 | 1.00 (Reference) | 1.00 (Reference) |
| Q2 | 1.03 (0.64, 1.65) | 1.13 (0.73, 1.75) |  | Q2 | 1.09 (0.73, 1.65) | 1.17 (0.76, 1.82) |
| Q3 | 1.15 (0.70, 1.87) | 1.32 (0.87, 1.99) |  | Q3 | 1.14 (0.76, 1.70) | 1.37 (0.91, 2.08) |
| Q4 | 1.17 (0.65, 2.13) | 1.08 (0.70, 1.65) |  | Q4 | 1.54 (1.05, 2.25) | 1.13 (0.74, 1.74) |
| a HR for fat distribution measurements. BMI (continuous) and each fat distribution measurement (quartiles) were put in the same model. | | | | | | |
| b HR for fat distribution measurements. Fat distribution measurements were adjusted for BMI by residual methods. | | | | | | |
| c BMI (quartiles) and each fat distribution measurement (quartiles) were put in the same model. | | | | | | |

| Supplementary Table ST3 Exploratory analyses for the associations between anthropometric measurements and liver cancer risk among non-smoking and non-alcohol drinking women (1996–2016) | | | | | | |
| --- | --- | --- | --- | --- | --- | --- |
|  | Excluded the first-two-years' cohort observation | Postmenopausal participants | No history of T2DM | No history of chronic hepatitis | No history of cholelithiasis | No family history of liver cancer |
| BMI (kg/m2) |  |  |  |  |  |  |
| Cases | 211 | 184 | 217 | 206 | 192 | 216 |
| HRa (95%CI) | 1.57 (1.05, 2.35) | 1.50 (0.98, 2.29) | 1.41 (0.95, 2.10) | 1.59 (1.04, 2.43) | 1.61 (1.06, 2.45) | 1.43 (0.96, 2.13) |
| BMI at 20 years old (kg/m2) |  |  |  |  |  |  |
| Cases | 156 | 125 | 162 | 147 | 144 | 158 |
| HRa (95%CI) | 1.23 (0.79, 1.92) | 1.55 (0.92, 2.59) | 1.30 (0.84, 2.03) | 1.26 (0.79, 2.00) | 0.98 (0.62, 1.54) | 1.14 (0.75, 1.75) |
| Adult weight gain (kg) |  |  |  |  |  |  |
| Cases | 175 | 144 | 179 | 166 | 159 | 175 |
| HRa (95%CI) | 2.06 (1.29, 3.28) | 1.96 (1.19, 3.24) | 1.61 (1.02, 2.56) | 1.70 (1.06, 2.73) | 2.04 (1.26, 3.30) | 1.69 (1.07, 2.68) |
| Annual average weight gain (kg/year) |  |  |  |  |  |  |
| Cases | 175 | 144 | 179 | 166 | 159 | 175 |
| HRa (95%CI) | 2.32 (1.40, 3.83) | 1.88 (1.11, 3.19) | 1.95 (1.19, 3.19) | 2.09 (1.25, 3.48) | 2.34 (1.39, 3.95) | 1.77 (1.08, 2.93) |
| WC (cm) |  |  |  |  |  |  |
| Cases | 211 | 184 | 217 | 206 | 192 | 216 |
| HRa (95%CI) | 1.76 (1.14, 2.71) | 1.74 (1.13, 2.70) | 1.49 (0.97, 2.30) | 1.40 (0.91, 2.15) | 1.85 (1.16, 2.95) | 1.44 (0.96, 2.17) |
| HC (cm) |  |  |  |  |  |  |
| Cases | 211 | 184 | 217 | 206 | 192 | 216 |
| HRa (95%CI) | 1.88 (1.19, 2.97) | 1.42 (0.95, 2.12) | 1.59 (1.03, 2.44) | 1.62 (1.03, 2.57) | 1.71 (1.09, 2.67) | 1.47 (0.96, 2.25) |
| WHR |  |  |  |  |  |  |
| Cases | 211 | 184 | 217 | 206 | 192 | 216 |
| HRa (95%CI) | 1.32 (0.87, 1.99) | 1.09 (0.71, 1.68) | 1.14 (0.77, 1.70) | 1.26 (0.83, 1.94) | 1.34 (0.88, 2.06) | 1.26 (0.84, 1.89) |
| WHtR |  |  |  |  |  |  |
| Cases | 211 | 184 | 217 | 206 | 192 | 216 |
| HRa (95%CI) | 1.85 (1.14, 2.99) | 1.63 (1.05, 2.53) | 1.54 (0.97, 2.43) | 1.52 (0.93, 2.49) | 1.66 (1.02, 2.71) | 1.47 (0.93, 2.34) |
| a HRs for the highest quartile versus the lowest quartile. Adjusted for age, education, income, menopausal status, age at menarche, history of chronic hepatitis, history of cholelithiasis, family history of liver cancer, total energy intake and total physical activity, except for the one of interest. Analyses of adult weight gain and annual average weight gain were further adjusted for weight at 20 years old. | | | | | | |


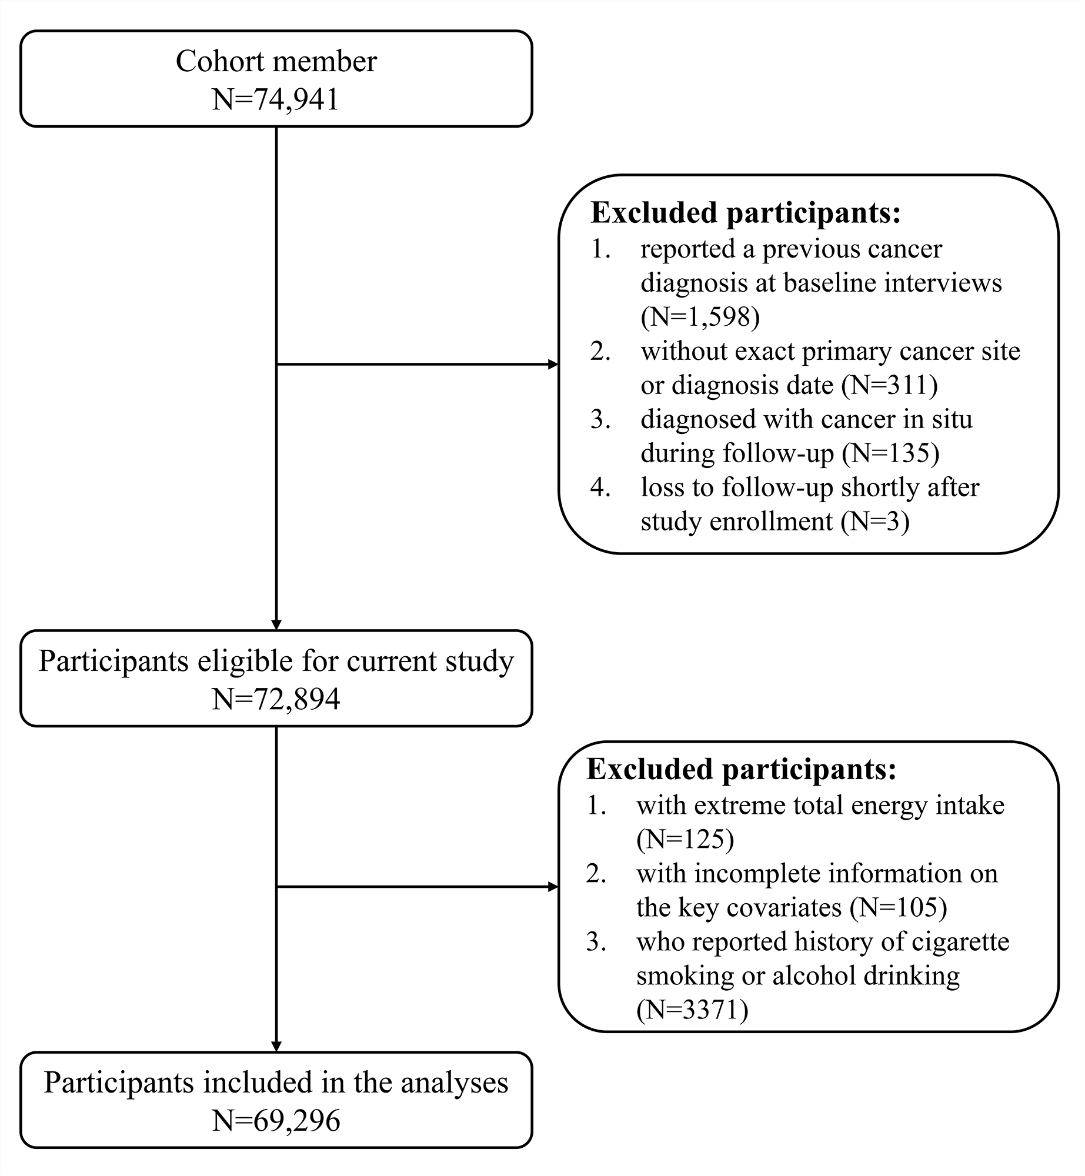


Supplementary Figure SF1 Flow diagram of the participants selection process
