# Supplementary material for: Dose–Response Association between Adiposity and Liver Cancer Incidence: A Prospective Cohort Study among Non-Smoking and Non–Alcohol-Drinking Chinese Women
Source: Oxford University Press journal article supplement (doi:10.1158/1055-9965.epi-20-1610), 2021-04-13
Supplement: 10559965epi201610-sup-255271_3_supp_7022302_qqtzzm.docx [file 10559965epi201610-sup-255271_3_supp_7022302_qqtzzm.docx]

Supplementary Table ST1 shows the correlations of the anthropometric measurements.

Supplementary Table ST2 shows the multivariable-adjusted HRs for mutually adjusted models.

Supplementary Table ST3 shows the results of exploratory analyses for the associations between anthropometric measurements and liver cancer risk.

Supplementary Figure SF1 shows the selection process of eligible participants.
